# Supplementary material
Source: publisher figshare collection journal article supplement (https://geolsoc.figshare.com/ndownloader/files/28562492)
Supplement: Supplementary file 1 [file 28562492]

## Sheet: Hoja1
Taxa	PCA Factor 1	PCA Factor 2	PCA Factor 3
C. jansae	0.34918	-0.336	-0.16963
B. prinsii	0.38403	-0.13604	-0.18284
S. avitum	0.33531	0.01821	0.0056177
B. novum	0.06137	0.48855	0.25891
B. finchii	0.36993	-0.1726	0.25918
Calyculus spp.	0.026967	0.43864	0.54318
L. hauffii	0.063215	0.43884	-0.53416
L. sigillatus	-0.30403	0.20653	-0.32743
L. crucicentralis	-0.34545	-0.077692	-0.1907
C. crassus	-0.42593	-0.23344	0.14674
T. patulus	-0.28221	-0.3341	0.241
